# Supplementary material for: Influence of acclimatization time on parameters of barometric whole-body plethysmography in healthy adult cats
Source: PubMed Central journal article supplement (PMC10931434; doi:10.1371/journal.pone.0299252), 2024-03-12
Supplement: pone.0299252.s001.pdf [file pone.0299252.s001.pdf]

**S1 Table. Data of all 48 cats included in the study.**

| CAT NR. | AGE (YEAR) | SEX            | BREED                          | WEIGHT (KG) | BODY CONDITION SCORE |
|---------|------------|----------------|--------------------------------|-------------|----------------------|
| 1       | 1          | male castrated | Norwegian Forest Cat           | 6.6         | 5/9                  |
| 2       | 1          | male castrated | Norwegian Forest Cat           | 3.97        | 4/9                  |
| 3       | 1          | female spayed  | Norwegian Forest Cat           | 6.2         | 5/9                  |
| 4       | 1          | male castrated | Norwegian Forest Cat           | 6.2         | 5/9                  |
| 5       | 1          | male castrated | European Shorthair             | 4.5         | 4/9                  |
| 6       | 1          | female spayed  | European Shorthair             | 3.1         | 3/9                  |
| 7       | 1          | female spayed  | European Shorthair             | 4.6         | 4/9                  |
| 8       | 1          | male castrated | European Shorthair             | 5.35        | 5/9                  |
| 9       | 1          | male castrated | European Shorthair             | 4.25        | 5/9                  |
| 10      | 1          | male castrated | European Shorthair             | 4.35        | 4/9                  |
| 11      | 1          | male castrated | European Shorthair             | 4.5         | 4/9                  |
| 12      | 1          | male intact    | Bengal x British Shorthair mix | 5.0         | 5/9                  |
| 13      | 1          | male intact    | Bengal x British Shorthair mix | 5.0         | 4/9                  |
| 14      | 9          | female spayed  | Siberian Forest Cat            | 4.57        | 4/9                  |

|    |    |                |                      |      |     |
|----|----|----------------|----------------------|------|-----|
| 15 | 7  | female spayed  | Siberian Forest Cat  | 4.2  | 4/9 |
| 16 | 1  | male castrated | Maine Coon           | 4.4  | 5/9 |
| 17 | 1  | female spayed  | British Longhair     | 3.3  | 4/9 |
| 18 | 1  | male castrated | European Shorthair   | 3.85 | 4/9 |
| 19 | 1  | male castrated | British Shorthair    | 3.8  | 5/9 |
| 20 | 1  | male castrated | European Shorthair   | 4.9  | 5/9 |
| 21 | 1  | female spayed  | European Shorthair   | 3.45 | 4/9 |
| 22 | 1  | female intact  | British Shorthair    | 3.4  | 4/9 |
| 23 | 1  | male castrated | British Shorthair    | 4.4  | 5/9 |
| 24 | 1  | male castrated | European Shorthair   | 4.2  | 4/9 |
| 25 | 16 | male castrated | European Shorthair   | 5.5  | 5/9 |
| 26 | 7  | female spayed  | European Shorthair   | 5.4  | 5/9 |
| 27 | 3  | male castrated | European Shorthair   | 5.3  | 5/9 |
| 28 | 7  | male castrated | European Shorthair   | 4.8  | 5/9 |
| 29 | 8  | female spayed  | European Shorthair   | 3.9  | 4/9 |
| 30 | 1  | female intact  | Norwegian Forest Cat | 5.1  | 5/9 |

|    |    |                |                          |     |       |
|----|----|----------------|--------------------------|-----|-------|
| 31 | 1  | female intact  | Norwegian Forest Cat     | 5.1 | 5/9   |
| 32 | 15 | female spayed  | Maine Coon               | 5.3 | 3,5/9 |
| 33 | 15 | female spayed  | Birman                   | 3.5 | 3,5/9 |
| 34 | 13 | female spayed  | British Shorthair mix    | 6.2 | 6/9   |
| 35 | 9  | female spayed  | European Shorthair       | 4.5 | 5/9   |
| 36 | 4  | male castrated | Norwegian Forest Cat mix | 5.4 | 5/9   |
| 37 | 11 | female spayed  | European Shorthair       | 3.7 | 4/9   |
| 38 | 3  | female spayed  | Birman                   | 3.7 | 3/9   |
| 39 | 3  | male castrated | Birman                   | 4.6 | 4/9   |
| 40 | 4  | male castrated | Birman x Persian mix     | 4.9 | 4/9   |
| 41 | 5  | male castrated | European Shorthair       | 3.7 | 3,5/9 |
| 42 | 8  | male castrated | European Shorthair       | 4.9 | 5/9   |
| 43 | 8  | female spayed  | European Shorthair       | 3.6 | 4/9   |
| 44 | 4  | female intact  | Birman x Persian mix     | 3.2 | 4/9   |
| 45 | 7  | female spayed  | Birman                   | 3.1 | 4/9   |
| 46 | 6  | female spayed  | European Shorthair       | 3.7 | 4/9   |

|    |   |                   |                         |     |     |
|----|---|-------------------|-------------------------|-----|-----|
| 47 | 2 | male<br>castrated | Bengal                  | 5.1 | 4/9 |
| 48 | 4 | male<br>castrated | Birman x<br>Persian mix | 5.2 | 4/9 |
