# Supplementary material for: Influence of acclimatization time on parameters of barometric whole-body plethysmography in healthy adult cats
Source: PubMed Central journal article supplement (PMC10931434; doi:10.1371/journal.pone.0299252), 2024-03-12
Supplement: pone.0299252.s002.pdf [file pone.0299252.s002.pdf]

**S2 Table. Mean values of all BWBP parameters for each cat and each time period.**

| CAT NR. | TIME | RR     | PENH | PAU  | TI   | TE   | TR   | TV/BW | MV/BW  | PIF/BW | PEF/BW | PEF/EF50 |
|---------|------|--------|------|------|------|------|------|-------|--------|--------|--------|----------|
| 1       | T1   | 131.73 | 0.50 | 0.72 | 0.23 | 0.30 | 0.18 | 1.95  | 214.50 | 12.92  | 8.36   | 1.08     |
| 1       | T2   | 103.47 | 0.47 | 0.73 | 0.26 | 0.36 | 0.21 | 2.10  | 196.42 | 12.00  | 7.48   | 1.09     |
| 1       | T3   | 86.40  | 0.46 | 0.71 | 0.30 | 0.42 | 0.25 | 2.01  | 164.18 | 10.06  | 6.25   | 1.08     |
| 2       | T1   | 21.55  | 0.82 | 1.41 | 0.95 | 2.06 | 0.88 | 9.90  | 211.27 | 16.32  | 8.09   | 1.16     |
| 2       | T2   | 22.11  | 0.87 | 1.38 | 0.97 | 1.86 | 0.82 | 10.14 | 223.39 | 16.44  | 9.00   | 1.17     |
| 2       | T3   | 21.27  | 0.99 | 1.63 | 0.98 | 2.12 | 0.83 | 10.00 | 206.33 | 16.35  | 8.31   | 1.21     |
| 3       | T1   | 149.35 | 0.44 | 0.64 | 0.19 | 0.23 | 0.14 | 1.78  | 249.81 | 14.53  | 9.72   | 1.03     |
| 3       | T2   | 142.07 | 0.44 | 0.65 | 0.20 | 0.25 | 0.15 | 1.61  | 212.38 | 12.31  | 8.28   | 1.04     |
| 3       | T3   | 128.09 | 0.43 | 0.65 | 0.21 | 0.27 | 0.17 | 1.56  | 193.62 | 11.25  | 7.32   | 1.03     |
| 4       | T1   | 59.26  | 0.45 | 0.84 | 0.49 | 0.70 | 0.38 | 3.54  | 189.67 | 14.04  | 6.83   | 1.24     |
| 4       | T2   | 86.54  | 0.47 | 0.79 | 0.29 | 0.44 | 0.24 | 2.45  | 202.01 | 12.88  | 7.37   | 1.12     |
| 4       | T3   | 102.93 | 0.50 | 0.77 | 0.25 | 0.35 | 0.20 | 2.16  | 211.34 | 12.83  | 8.09   | 1.10     |
| 5       | T1   | 207.87 | 0.53 | 0.68 | 0.14 | 0.15 | 0.09 | 1.58  | 323.26 | 18.00  | 13.85  | 1.01     |
| 5       | T2   | 203.53 | 0.53 | 0.68 | 0.14 | 0.16 | 0.09 | 1.51  | 303.36 | 17.01  | 13.00  | 1.01     |
| 5       | T3   | 196.58 | 0.53 | 0.68 | 0.15 | 0.17 | 0.10 | 1.65  | 298.41 | 16.68  | 12.77  | 1.02     |
| 6       | T1   | 71.00  | 0.50 | 0.76 | 0.36 | 0.52 | 0.30 | 3.73  | 255.76 | 15.17  | 9.30   | 1.18     |
| 6       | T2   | 75.10  | 0.54 | 0.77 | 0.34 | 0.49 | 0.28 | 3.56  | 260.41 | 15.04  | 9.78   | 1.20     |
| 6       | T3   | 78.58  | 0.52 | 0.76 | 0.34 | 0.48 | 0.27 | 3.85  | 281.45 | 16.44  | 10.48  | 1.19     |
| 7       | T1   | 141.06 | 0.42 | 0.65 | 0.20 | 0.27 | 0.16 | 2.32  | 300.00 | 17.48  | 10.85  | 1.05     |
| 7       | T2   | 140.17 | 0.40 | 0.64 | 0.19 | 0.26 | 0.16 | 2.04  | 269.97 | 15.89  | 9.73   | 1.05     |
| 7       | T3   | 95.85  | 0.46 | 0.70 | 0.30 | 0.41 | 0.24 | 3.48  | 282.02 | 16.48  | 10.25  | 1.11     |
| 8       | T1   | 196.88 | 0.56 | 0.67 | 0.16 | 0.17 | 0.10 | 2.12  | 380.46 | 20.48  | 16.56  | 1.02     |

|           |    |        |      |      |      |      |      |      |        |       |       |      |
|-----------|----|--------|------|------|------|------|------|------|--------|-------|-------|------|
| <b>8</b>  | T2 | 199.38 | 0.58 | 0.69 | 0.15 | 0.17 | 0.10 | 2.05 | 367.86 | 19.68 | 16.31 | 1.02 |
| <b>8</b>  | T3 | 207.35 | 0.57 | 0.68 | 0.15 | 0.16 | 0.10 | 1.97 | 359.43 | 19.06 | 15.68 | 1.02 |
| <b>9</b>  | T1 | 109.36 | 0.36 | 0.65 | 0.23 | 0.33 | 0.20 | 3.23 | 346.12 | 21.68 | 11.88 | 1.07 |
| <b>9</b>  | T2 | 102.62 | 0.38 | 0.67 | 0.25 | 0.36 | 0.22 | 3.66 | 365.64 | 22.36 | 12.35 | 1.07 |
| <b>9</b>  | T3 | 125.35 | 0.45 | 0.68 | 0.21 | 0.28 | 0.17 | 2.95 | 359.25 | 20.94 | 13.36 | 1.07 |
| <b>10</b> | T1 | 54.29  | 0.63 | 0.86 | 0.46 | 0.66 | 0.36 | 5.01 | 269.05 | 15.96 | 10.26 | 1.24 |
| <b>10</b> | T2 | 51.93  | 0.67 | 0.90 | 0.48 | 0.69 | 0.37 | 5.11 | 261.86 | 15.77 | 10.40 | 1.27 |
| <b>10</b> | T3 | 55.00  | 0.57 | 0.83 | 0.45 | 0.66 | 0.36 | 4.92 | 263.95 | 16.61 | 10.07 | 1.24 |
| <b>11</b> | T1 | 130.89 | 0.53 | 0.75 | 0.22 | 0.26 | 0.15 | 3.44 | 419.85 | 24.84 | 16.48 | 1.10 |
| <b>11</b> | T2 | 153.92 | 0.59 | 0.79 | 0.19 | 0.22 | 0.12 | 2.36 | 339.15 | 19.28 | 13.86 | 1.09 |
| <b>11</b> | T3 | 153.64 | 0.52 | 0.75 | 0.18 | 0.22 | 0.13 | 2.33 | 354.69 | 21.15 | 13.99 | 1.10 |
| <b>12</b> | T1 | 171.28 | 0.59 | 0.78 | 0.17 | 0.20 | 0.11 | 2.61 | 422.65 | 23.77 | 16.90 | 1.07 |
| <b>12</b> | T2 | 190.76 | 0.60 | 0.78 | 0.15 | 0.18 | 0.10 | 2.18 | 388.90 | 21.93 | 16.42 | 1.05 |
| <b>12</b> | T3 | 186.39 | 0.66 | 0.78 | 0.16 | 0.19 | 0.10 | 2.48 | 402.95 | 22.26 | 17.75 | 1.07 |
| <b>13</b> | T1 | 64.86  | 0.71 | 0.98 | 0.39 | 0.68 | 0.38 | 4.15 | 236.63 | 16.72 | 9.18  | 1.25 |
| <b>13</b> | T2 | 82.43  | 0.60 | 0.84 | 0.33 | 0.49 | 0.27 | 2.98 | 217.59 | 13.40 | 8.45  | 1.19 |
| <b>13</b> | T3 | 67.66  | 0.46 | 0.82 | 0.33 | 0.59 | 0.33 | 2.58 | 170.20 | 11.70 | 6.07  | 1.29 |
| <b>14</b> | T1 | 52.79  | 0.56 | 0.77 | 0.52 | 0.73 | 0.42 | 6.06 | 303.95 | 18.02 | 12.10 | 1.15 |
| <b>14</b> | T2 | 45.74  | 0.64 | 0.93 | 0.56 | 0.85 | 0.44 | 4.80 | 216.31 | 13.75 | 8.69  | 1.19 |
| <b>14</b> | T3 | 44.50  | 0.62 | 0.95 | 0.58 | 0.94 | 0.49 | 4.85 | 207.28 | 13.76 | 8.40  | 1.24 |
| <b>15</b> | T1 | 58.46  | 0.56 | 0.86 | 0.47 | 0.70 | 0.38 | 5.48 | 289.09 | 19.40 | 11.58 | 1.18 |
| <b>15</b> | T2 | 43.13  | 0.48 | 0.95 | 0.53 | 1.00 | 0.52 | 4.39 | 184.52 | 14.74 | 6.49  | 1.24 |
| <b>15</b> | T3 | 42.23  | 0.46 | 0.95 | 0.55 | 1.02 | 0.53 | 4.46 | 178.45 | 14.90 | 6.39  | 1.27 |
| <b>16</b> | T1 | 105.92 | 0.70 | 0.84 | 0.26 | 0.32 | 0.17 | 4.47 | 468.51 | 25.87 | 20.52 | 1.18 |
| <b>16</b> | T2 | 105.52 | 0.74 | 0.88 | 0.25 | 0.32 | 0.17 | 4.20 | 438.85 | 24.63 | 19.82 | 1.24 |

|           |    |        |      |      |      |      |      |      |        |       |       |      |
|-----------|----|--------|------|------|------|------|------|------|--------|-------|-------|------|
| <b>16</b> | T3 | 93.25  | 0.73 | 0.88 | 0.28 | 0.37 | 0.20 | 4.32 | 398.90 | 22.61 | 17.67 | 1.23 |
| <b>17</b> | T1 | 257.46 | 0.68 | 0.74 | 0.13 | 0.12 | 0.07 | 2.85 | 613.61 | 32.47 | 29.27 | 1.04 |
| <b>17</b> | T2 | 268.77 | 0.78 | 0.81 | 0.12 | 0.12 | 0.06 | 2.51 | 573.00 | 30.58 | 29.63 | 1.01 |
| <b>17</b> | T3 | 259.17 | 0.72 | 0.76 | 0.12 | 0.13 | 0.07 | 2.68 | 527.71 | 28.72 | 26.30 | 1.05 |
| <b>18</b> | T1 | 54.52  | 0.78 | 0.92 | 0.50 | 0.71 | 0.37 | 3.62 | 184.76 | 11.13 | 8.26  | 1.54 |
| <b>18</b> | T2 | 44.53  | 0.82 | 1.01 | 0.59 | 0.86 | 0.43 | 3.70 | 154.59 | 10.15 | 7.13  | 1.60 |
| <b>18</b> | T3 | 43.50  | 0.90 | 1.05 | 0.65 | 0.92 | 0.45 | 3.88 | 150.93 | 10.08 | 7.54  | 1.61 |
| <b>19</b> | T1 | 68.23  | 0.49 | 0.81 | 0.36 | 0.54 | 0.30 | 3.89 | 261.38 | 17.40 | 9.78  | 1.26 |
| <b>19</b> | T2 | 63.79  | 0.50 | 0.83 | 0.38 | 0.59 | 0.32 | 3.93 | 240.64 | 16.77 | 9.26  | 1.31 |
| <b>19</b> | T3 | 65.84  | 0.52 | 0.84 | 0.38 | 0.58 | 0.32 | 3.98 | 250.72 | 17.09 | 9.68  | 1.28 |
| <b>20</b> | T1 | 29.97  | 1.09 | 1.30 | 0.82 | 1.30 | 0.57 | 6.63 | 192.85 | 12.29 | 8.43  | 1.26 |
| <b>20</b> | T2 | 25.43  | 1.04 | 1.33 | 0.89 | 1.54 | 0.67 | 5.81 | 145.66 | 10.17 | 6.38  | 1.37 |
| <b>20</b> | T3 | 27.91  | 1.05 | 1.31 | 0.88 | 1.46 | 0.64 | 6.55 | 170.82 | 11.48 | 7.57  | 1.32 |
| <b>21</b> | T1 | 46.72  | 0.60 | 0.87 | 0.51 | 0.81 | 0.43 | 5.26 | 242.93 | 15.26 | 9.33  | 1.32 |
| <b>21</b> | T2 | 49.42  | 0.53 | 0.83 | 0.47 | 0.78 | 0.43 | 4.60 | 221.16 | 14.70 | 8.25  | 1.35 |
| <b>21</b> | T3 | 50.95  | 0.57 | 0.85 | 0.45 | 0.74 | 0.41 | 4.48 | 223.00 | 14.72 | 8.75  | 1.42 |
| <b>22</b> | T1 | 98.16  | 0.53 | 0.75 | 0.29 | 0.36 | 0.21 | 3.99 | 380.35 | 20.74 | 13.87 | 1.13 |
| <b>22</b> | T2 | 91.83  | 0.59 | 0.77 | 0.31 | 0.39 | 0.22 | 4.06 | 348.90 | 19.09 | 13.69 | 1.16 |
| <b>22</b> | T3 | 84.92  | 0.57 | 0.78 | 0.32 | 0.42 | 0.24 | 4.19 | 338.23 | 19.36 | 13.10 | 1.19 |
| <b>23</b> | T1 | 60.89  | 0.40 | 0.59 | 0.43 | 0.58 | 0.37 | 4.66 | 275.31 | 14.99 | 10.07 | 1.11 |
| <b>23</b> | T2 | 51.84  | 0.39 | 0.61 | 0.49 | 0.70 | 0.44 | 4.60 | 231.18 | 13.06 | 8.29  | 1.11 |
| <b>23</b> | T3 | 55.17  | 0.41 | 0.69 | 0.45 | 0.70 | 0.42 | 4.11 | 215.15 | 12.78 | 7.48  | 1.13 |
| <b>24</b> | T1 | 96.92  | 0.64 | 0.75 | 0.30 | 0.34 | 0.20 | 2.54 | 236.03 | 12.06 | 9.75  | 1.10 |
| <b>24</b> | T2 | 108.21 | 0.70 | 0.74 | 0.28 | 0.29 | 0.17 | 2.35 | 242.52 | 11.85 | 10.65 | 1.09 |
| <b>24</b> | T3 | 85.29  | 0.71 | 0.79 | 0.35 | 0.40 | 0.24 | 2.76 | 225.86 | 11.26 | 9.71  | 1.13 |

|           |    |        |      |      |      |      |      |      |        |       |       |      |
|-----------|----|--------|------|------|------|------|------|------|--------|-------|-------|------|
| <b>25</b> | T1 | 48.89  | 0.49 | 0.80 | 0.48 | 0.78 | 0.44 | 4.34 | 209.18 | 13.42 | 7.27  | 1.22 |
| <b>25</b> | T2 | 39.95  | 0.51 | 0.80 | 0.58 | 0.96 | 0.53 | 4.42 | 171.00 | 11.61 | 6.31  | 1.39 |
| <b>25</b> | T3 | 39.43  | 0.51 | 0.84 | 0.57 | 0.98 | 0.53 | 4.29 | 165.17 | 11.78 | 6.11  | 1.37 |
| <b>26</b> | T1 | 65.90  | 0.45 | 0.77 | 0.36 | 0.65 | 0.37 | 4.20 | 255.79 | 16.41 | 8.62  | 1.21 |
| <b>26</b> | T2 | 55.69  | 0.49 | 0.79 | 0.44 | 0.77 | 0.43 | 4.32 | 225.19 | 14.72 | 8.07  | 1.24 |
| <b>26</b> | T3 | 48.92  | 0.54 | 0.86 | 0.55 | 0.94 | 0.52 | 4.56 | 196.24 | 13.40 | 7.27  | 1.26 |
| <b>27</b> | T1 | 70.20  | 0.74 | 0.91 | 0.42 | 0.62 | 0.33 | 4.52 | 286.81 | 16.21 | 11.82 | 1.15 |
| <b>27</b> | T2 | 41.73  | 0.63 | 0.91 | 0.58 | 0.94 | 0.50 | 5.21 | 208.05 | 13.11 | 8.00  | 1.26 |
| <b>27</b> | T3 | 38.32  | 0.69 | 0.98 | 0.63 | 1.02 | 0.52 | 6.04 | 223.99 | 14.43 | 8.74  | 1.25 |
| <b>28</b> | T1 | 99.17  | 0.52 | 0.72 | 0.27 | 0.34 | 0.20 | 3.58 | 353.02 | 19.36 | 13.58 | 1.05 |
| <b>28</b> | T2 | 105.33 | 0.49 | 0.69 | 0.26 | 0.32 | 0.19 | 3.31 | 342.24 | 18.89 | 13.02 | 1.05 |
| <b>28</b> | T3 | 99.82  | 0.47 | 0.69 | 0.27 | 0.35 | 0.21 | 3.71 | 358.85 | 20.39 | 13.36 | 1.05 |
| <b>29</b> | T1 | 30.75  | 0.64 | 0.98 | 0.74 | 1.56 | 0.78 | 7.50 | 212.83 | 15.04 | 8.09  | 1.47 |
| <b>29</b> | T2 | 20.03  | 0.68 | 1.06 | 0.99 | 2.09 | 1.02 | 7.83 | 155.91 | 12.71 | 6.12  | 1.63 |
| <b>29</b> | T3 | 18.99  | 0.64 | 1.03 | 1.02 | 2.17 | 1.08 | 7.58 | 143.05 | 11.86 | 5.42  | 1.57 |
| <b>30</b> | T1 | 74.03  | 0.44 | 0.71 | 0.35 | 0.51 | 0.30 | 3.01 | 214.03 | 12.55 | 7.43  | 1.10 |
| <b>30</b> | T2 | 61.83  | 0.61 | 0.86 | 0.41 | 0.60 | 0.33 | 3.09 | 183.46 | 10.86 | 7.05  | 1.21 |
| <b>30</b> | T3 | 57.12  | 0.48 | 0.72 | 0.46 | 0.67 | 0.40 | 4.07 | 215.63 | 12.96 | 8.12  | 1.14 |
| <b>31</b> | T1 | 92.18  | 0.54 | 0.67 | 0.32 | 0.37 | 0.23 | 2.84 | 241.13 | 12.39 | 9.48  | 1.04 |
| <b>31</b> | T2 | 102.10 | 0.57 | 0.68 | 0.29 | 0.32 | 0.19 | 2.28 | 224.08 | 11.00 | 8.93  | 1.04 |
| <b>31</b> | T3 | 91.26  | 0.61 | 0.71 | 0.33 | 0.36 | 0.21 | 2.50 | 208.00 | 10.50 | 8.67  | 1.06 |
| <b>32</b> | T1 | 37.94  | 0.54 | 0.88 | 0.63 | 0.96 | 0.52 | 6.40 | 241.30 | 16.56 | 9.00  | 1.19 |
| <b>32</b> | T2 | 34.52  | 0.56 | 0.87 | 0.69 | 1.05 | 0.57 | 6.53 | 224.18 | 15.03 | 8.55  | 1.19 |
| <b>32</b> | T3 | 34.42  | 0.58 | 0.85 | 0.72 | 1.05 | 0.58 | 7.53 | 255.30 | 16.22 | 10.08 | 1.20 |
| <b>33</b> | T1 | 34.48  | 0.82 | 1.11 | 0.67 | 1.17 | 0.56 | 7.83 | 271.60 | 17.25 | 11.52 | 1.33 |

|           |    |        |      |      |      |      |       |       |        |       |       |      |
|-----------|----|--------|------|------|------|------|-------|-------|--------|-------|-------|------|
| <b>33</b> | T2 | 32.34  | 0.75 | 1.03 | 0.74 | 1.22 | 0.61  | 7.93  | 249.45 | 15.57 | 10.13 | 1.29 |
| <b>33</b> | T3 | 26.86  | 0.60 | 0.84 | 0.89 | 1.36 | 0.7.5 | 8.06  | 216.13 | 12.62 | 8.12  | 1.22 |
| <b>34</b> | T1 | 45.78  | 0.46 | 0.76 | 0.56 | 0.83 | 0.47  | 3.11  | 137.71 | 8.94  | 4.85  | 1.18 |
| <b>34</b> | T2 | 41.80  | 0.49 | 0.76 | 0.63 | 0.90 | 0.52  | 3.48  | 137.50 | 8.62  | 5.07  | 1.16 |
| <b>34</b> | T3 | 34.78  | 0.56 | 0.87 | 0.71 | 1.05 | 0.57  | 4.34  | 148.63 | 9.68  | 5.51  | 1.18 |
| <b>35</b> | T1 | 88.84  | 0.67 | 0.76 | 0.33 | 0.37 | 0.21  | 3.08  | 268.41 | 13.53 | 11.22 | 1.17 |
| <b>35</b> | T2 | 72.19  | 0.69 | 0.82 | 0.39 | 0.49 | 0.27  | 3.0   | 206.35 | 11.19 | 8.73  | 1.26 |
| <b>35</b> | T3 | 63.70  | 0.70 | 0.83 | 0.44 | 0.55 | 0.30  | 3.32  | 206.92 | 11.42 | 8.86  | 1.23 |
| <b>36</b> | T1 | 28.79  | 0.46 | 0.77 | 0.87 | 1.53 | 0.94  | 5.68  | 155.88 | 10.43 | 6.34  | 1.20 |
| <b>36</b> | T2 | 18.92  | 0.43 | 0.76 | 1.14 | 2.12 | 1.23  | 6.13  | 115.35 | 8.13  | 4.36  | 1.21 |
| <b>36</b> | T3 | 18.31  | 0.55 | 0.86 | 1.26 | 2.06 | 1.16  | 6.43  | 117.13 | 7.87  | 4.75  | 1.21 |
| <b>37</b> | T1 | 29.93  | 1.01 | 1.02 | 1.00 | 1.51 | 0.75  | 10.32 | 258.91 | 15.66 | 12.38 | 1.72 |
| <b>37</b> | T2 | 27.42  | 1.15 | 1.10 | 1.14 | 1.73 | 0.82  | 11.12 | 244.26 | 15.57 | 12.57 | 1.86 |
| <b>37</b> | T3 | 21.47  | 1.25 | 1.10 | 1.22 | 1.80 | 0.86  | 12.03 | 241.51 | 15.35 | 13.66 | 2.12 |
| <b>38</b> | T1 | 111.77 | 0.44 | 0.65 | 0.24 | 0.31 | 0.19  | 3.59  | 391.22 | 21.67 | 14.46 | 1.03 |
| <b>38</b> | T2 | 135.29 | 0.48 | 0.64 | 0.22 | 0.25 | 0.15  | 3.27  | 400.36 | 21.30 | 15.80 | 1.04 |
| <b>38</b> | T3 | 135.49 | 0.45 | 0.64 | 0.21 | 0.26 | 0.16  | 2.74  | 339.38 | 18.51 | 12.79 | 1.03 |
| <b>39</b> | T1 | 35.68  | 0.70 | 1.02 | 0.78 | 1.17 | 0.60  | 6.35  | 203.10 | 13.32 | 8.56  | 1.26 |
| <b>39</b> | T2 | 53.52  | 0.71 | 0.98 | 0.54 | 0.78 | 0.42  | 6.39  | 274.97 | 17.76 | 11.11 | 1.20 |
| <b>39</b> | T3 | 56.21  | 0.66 | 0.88 | 0.51 | 0.77 | 0.42  | 5.74  | 280.85 | 17.51 | 12.87 | 1.24 |
| <b>40</b> | T1 | 66.72  | 0.57 | 0.78 | 0.40 | 0.51 | 0.29  | 5.01  | 326.18 | 18.30 | 12.69 | 1.12 |
| <b>40</b> | T2 | 73.65  | 0.60 | 0.80 | 0.37 | 0.47 | 0.26  | 3.99  | 284.23 | 16.39 | 11.53 | 1.14 |
| <b>40</b> | T3 | 67.67  | 0.59 | 0.80 | 0.39 | 0.50 | 0.28  | 3.96  | 264.37 | 15.27 | 10.62 | 1.12 |
| <b>41</b> | T1 | 30.38  | 0.43 | 0.90 | 0.66 | 1.41 | 0.75  | 5.53  | 162.83 | 14.31 | 5.76  | 1.38 |
| <b>41</b> | T2 | 25.06  | 0.48 | 0.99 | 0.80 | 1.67 | 0.85  | 6.25  | 154.82 | 14.19 | 5.47  | 1.37 |

|           |    |        |      |      |      |      |      |      |        |       |       |      |
|-----------|----|--------|------|------|------|------|------|------|--------|-------|-------|------|
| <b>41</b> | T3 | 22.39  | 0.60 | 1.12 | 0.92 | 1.90 | 0.90 | 6.53 | 142.45 | 13.51 | 5.61  | 1.47 |
| <b>42</b> | T1 | 39.70  | 0.53 | 0.93 | 0.55 | 0.98 | 0.51 | 4.53 | 177.57 | 13.09 | 6.42  | 1.26 |
| <b>42</b> | T2 | 32.94  | 0.66 | 1.06 | 0.67 | 1.16 | 0.57 | 5.51 | 180.15 | 13.62 | 7.14  | 1.33 |
| <b>42</b> | T3 | 32.05  | 0.73 | 1.15 | 0.68 | 1.20 | 0.57 | 5.48 | 173.82 | 13.57 | 7.27  | 1.40 |
| <b>43</b> | T1 | 47.45  | 0.71 | 0.99 | 0.61 | 0.97 | 0.49 | 5.11 | 222.66 | 15.80 | 10.01 | 1.37 |
| <b>43</b> | T2 | 32.36  | 0.73 | 1.01 | 0.78 | 1.24 | 0.62 | 4.70 | 149.61 | 10.57 | 6.31  | 1.47 |
| <b>43</b> | T3 | 33.19  | 0.75 | 0.98 | 0.82 | 1.19 | 0.60 | 4.90 | 156.73 | 11.29 | 7.08  | 1.52 |
| <b>44</b> | T1 | 133.12 | 0.52 | 0.68 | 0.22 | 0.26 | 0.16 | 3.25 | 388.67 | 21.36 | 15.86 | 1.03 |
| <b>44</b> | T2 | 135.65 | 0.49 | 0.66 | 0.21 | 0.25 | 0.15 | 2.89 | 370.23 | 20.38 | 14.83 | 1.02 |
| <b>44</b> | T3 | 110.41 | 0.56 | 0.73 | 0.27 | 0.32 | 0.18 | 3.46 | 342.19 | 19.03 | 14.14 | 1.05 |
| <b>45</b> | T1 | 53.68  | 0.40 | 0.70 | 0.44 | 0.70 | 0.41 | 5.27 | 277.79 | 17.69 | 9.36  | 1.15 |
| <b>45</b> | T2 | 46.98  | 0.40 | 0.71 | 0.49 | 0.81 | 0.47 | 5.15 | 236.25 | 15.52 | 7.86  | 1.14 |
| <b>45</b> | T3 | 41.94  | 0.42 | 0.74 | 0.56 | 0.91 | 0.53 | 5.42 | 222.56 | 14.73 | 7.50  | 1.16 |
| <b>46</b> | T1 | 46.58  | 0.48 | 0.89 | 0.53 | 0.88 | 0.47 | 5.05 | 226.48 | 17.50 | 8.23  | 1.26 |
| <b>46</b> | T2 | 33.52  | 0.50 | 0.94 | 0.67 | 1.15 | 0.60 | 5.26 | 175.19 | 15.57 | 6.73  | 1.46 |
| <b>46</b> | T3 | 30.67  | 0.54 | 1.00 | 0.71 | 1.28 | 0.65 | 5.41 | 165.44 | 15.67 | 6.76  | 1.59 |
| <b>47</b> | T1 | 58.67  | 0.52 | 0.64 | 0.51 | 0.62 | 0.38 | 7.28 | 397.91 | 20.85 | 16.51 | 1.12 |
| <b>47</b> | T2 | 60.67  | 0.84 | 0.81 | 0.52 | 0.66 | 0.38 | 7.06 | 373.64 | 20.49 | 17.29 | 1.17 |
| <b>47</b> | T3 | 46.97  | 0.55 | 0.74 | 0.53 | 0.83 | 0.49 | 5.25 | 235.61 | 15.04 | 9.05  | 1.18 |
| <b>48</b> | T1 | 98.62  | 0.47 | 0.66 | 0.28 | 0.34 | 0.20 | 2.45 | 239.37 | 13.48 | 9.37  | 1.03 |
| <b>48</b> | T2 | 92.88  | 0.46 | 0.67 | 0.29 | 0.37 | 0.22 | 2.61 | 232.37 | 13.33 | 8.91  | 1.05 |
| <b>48</b> | T3 | 78.86  | 0.41 | 0.66 | 0.34 | 0.45 | 0.28 | 3.09 | 229.98 | 14.01 | 8.35  | 1.06 |
